# Supplementary material
Source: PubMed Central journal article supplement (PMC2955961)
Supplement: NIHMS242679-supplement-Supplementary_Data.pdf [file NIHMS242679-supplement-Supplementary_Data.pdf]

## Supplemental Data

### Ndfip1 Protein Promotes the Function of Itch Ubiquitin Ligase to Prevent T Cell Activation and T Helper 2 Cell-Mediated Inflammation

Paula M. Oliver, Xiao Cao, George Scott Worthen, Peijun Shi, Natalie Briones, Megan MacLeod, Janice White, Patricia Kirby, John Kappler, Philippa Marrack, and Baoli Yang

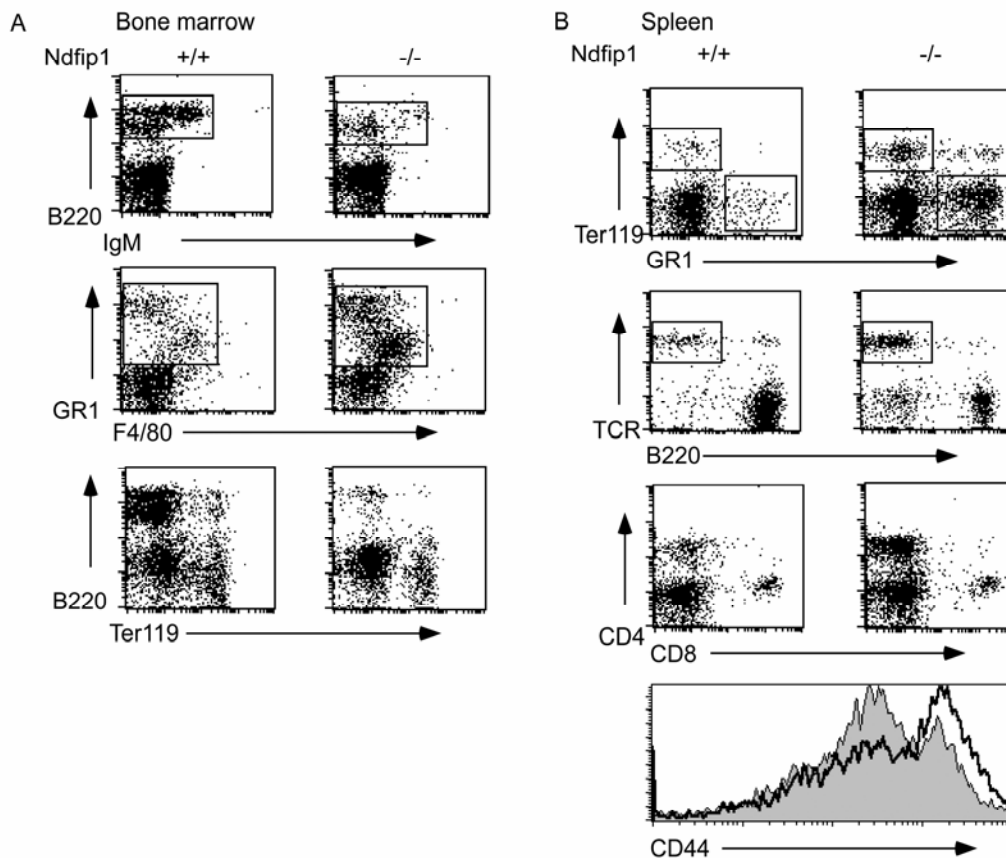

#### Figure S1. Mice Lacking *Ndfip1* Exhibit Multiple Defects in Cells of the Hematopoietic System

Bone marrow (A) and spleen cells (B) from 12 week old *Ndfip1*<sup>-/-</sup> and *Ndfip1*<sup>+/+</sup> were stained and analyzed by flow cytometry. Histogram shows TCR<sup>+</sup> cells from the spleen. The thick line represents *Ndfip1*<sup>-/-</sup> cells while the thin line shows *Ndfip1*<sup>+/+</sup> cells. FACS plots are representative data from one of four mice of each genotype that were analyzed in this manner.

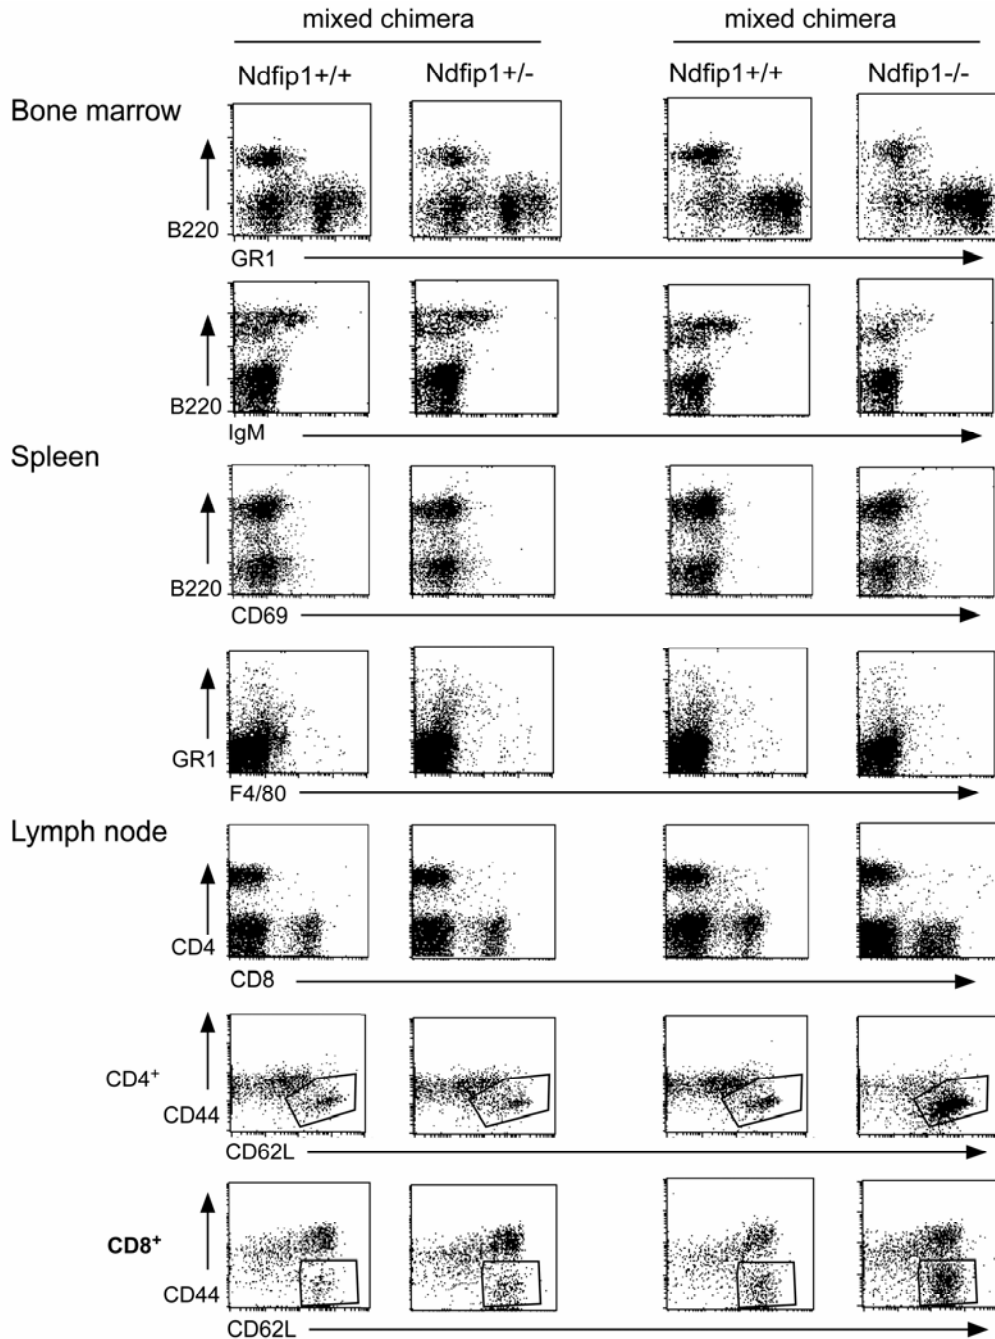

**Figure S2. *Ndfip1*<sup>+/-</sup> Cells Are Phenotypically Similar to *Ndfip1*<sup>+/+</sup> Cells**  
 Mixed bone marrow chimeras were made using an equal mixture of *Ndfip1*<sup>+/+</sup> (Ubi-GFP Tg) cells and either *Ndfip1*<sup>+/-</sup> or *Ndfip1*<sup>-/-</sup> cells. 5-6 weeks after reconstitution, cells from various organs were isolated and analyzed by flow cytometry. Adjacent vertical columns represent cells coming from the same mixed chimera. Boxed regions highlight activated T cells. These data are representative of four mice from each set of mixed chimeras.

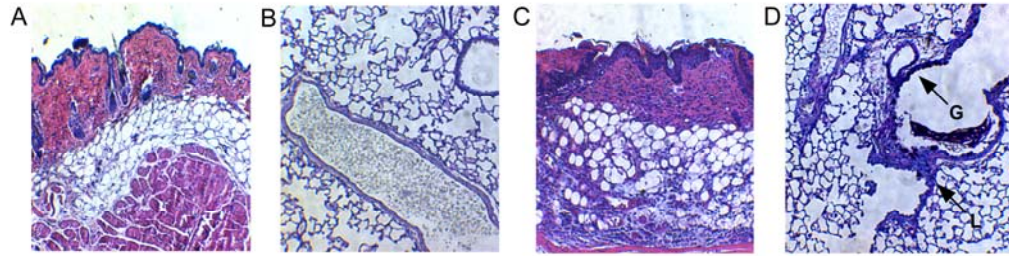

**Figure S3. Immunization with OVA + Alum Exacerbates Inflammatory Disease**

Mice were reconstituted with *Ndfip1*<sup>+/+</sup> or *Ndfip1*<sup>-/-</sup> bone marrow and 5 weeks later were immunized with OVA + Alum. 8 days after immunization, mice were sacrificed and sections were analyzed for inflammation. *Ndfip1*<sup>+/+</sup> (A) skin and (B) lung and *Ndfip1*<sup>-/-</sup> (C) skin and (D) lung sections were stained with H and E (skin) and PAS (lung) to demonstrate the extent of inflammation within these organs. G=goblet cells and L=lymphocytic cells.

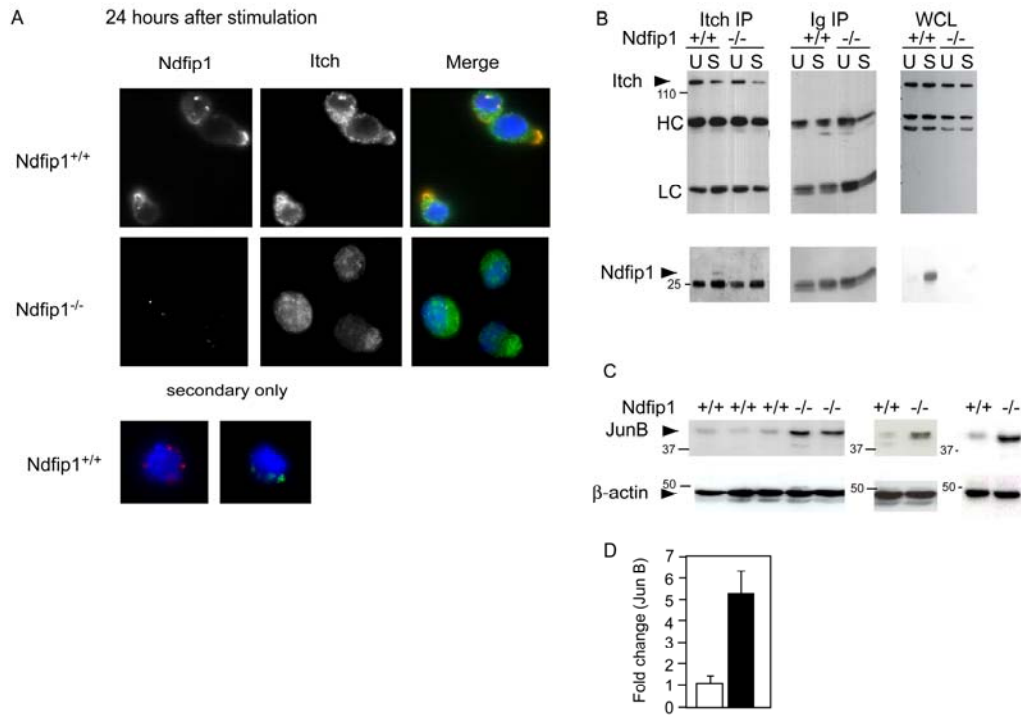

**Figure S4. Immunofluorescence and IP Controls**

(A) Wild-type T cells were stimulated for 24 hours with anti-CD3 and anti-CD28 and then fixed, permeabilized and stained for Ndfip1 (+ anti-hamster CY5) and Itch (+ anti-mouse AF488) or with secondary antibodies alone. (B) *Ndfip1*<sup>+/+</sup> and *Ndfip1*<sup>-/-</sup> T cells were cultured in media alone (U) or stimulated 24 hours with anti-CD3 and anti-CD28 (S). Cells were then lysed and immunoprecipitated with anti-Itch (Itch IP) or an IgG1 isotype control (Ig IP). Blots were probed with anti-Itch or anti-Ndfip1. (C) Whole cell lysates of CD4<sup>+</sup> T cells isolated from *Ndfip1*<sup>+/+</sup> or *Ndfip1*<sup>-/-</sup> mice were analyzed by immunoblot for JunB or β-actin (loading control). (D) To determine the fold change of JunB, amounts of JunB protein were normalized to β-actin and the ratio was then compared between the two genotypes. White bar represents *Ndfip1*<sup>+/+</sup> and black bar represents *Ndfip1*<sup>-/-</sup>. Error bars represent standard errors. LC=light chain, HC=heavy chain of the immunoprecipitating antibody.

| F2 genotyping results |      |     |      |       |
|-----------------------|------|-----|------|-------|
|                       | +/+  | +/- | -/-  | Total |
| Male                  | 41   | 67  | 18   | 126   |
| Female                | 40   | 75  | 29   | 144   |
| Total                 | 81   | 142 | 47   | 270   |
| percent               | 30%  | 53% | 17%  |       |
| Expected              | 67.5 | 135 | 67.5 |       |

0.00961 chi square test  
0.9952 chi distribution
